# Supplementary material for: Intraspecific Genomic Divergence and Minor Structural Variations in Leishmania (Viannia) panamensis
Source: PubMed Central journal article supplement (PMC7140786; doi:10.3390/genes11030252), 2020-02-27
Supplement: genes-11-00252-s001.pdf [file genes-11-00252-s001.pdf]

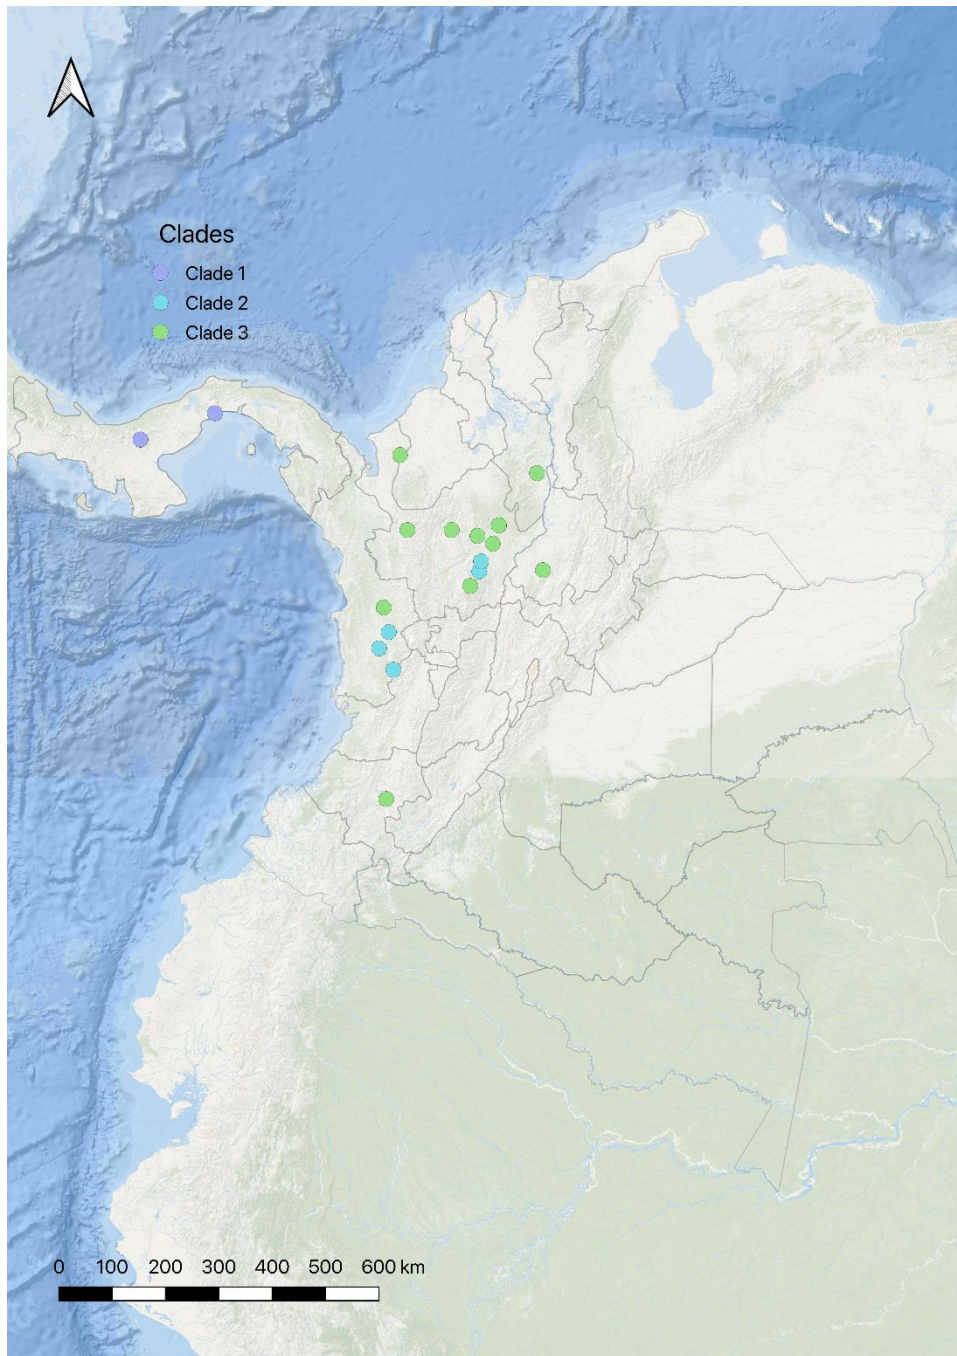

**Figure S1:** Geographical distribution of genomes included in the study. Georeferenced genomes discriminated by geographical localization. The maps were built on QGIS 3.6.0 based on the GPS coordinates of each isolation (QGIS Geographic Information System, Open Source Geospatial Foundation Project, <http://qgis.osgeo.org>). The circles represent each clade identified in this study.

**A**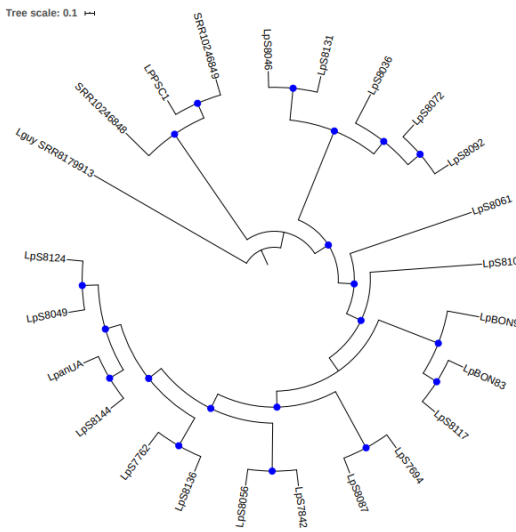**B**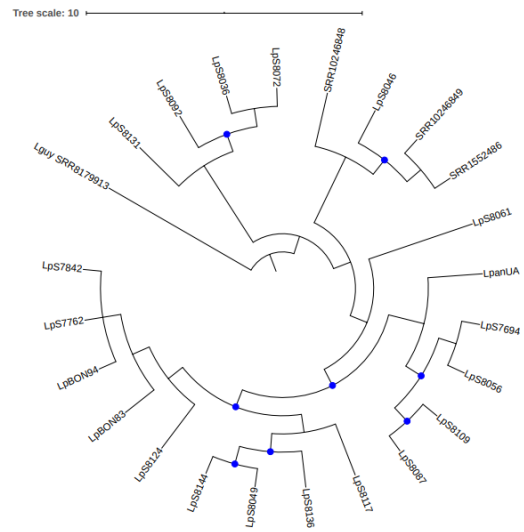

**Figure S2:** Preliminary *Leishmania panamensis* phylogenetic analysis of nuclear and mitochondrial genomes. The phylogenetic reconstructions represent the preliminary results that show the potential existence of three populations in the genome set of *L. panamensis* analyzed based on (A) nuclear and (B) mitochondrial (Maxicircle) SNPs alignments. *LpanUA* as reference genome of *L. panamensis* and *Lguy\_SRR8179913* (*L. guyanensis*) was used as an outgroup. The trees were built in FastTree double precision version 2.1.10 [31] and visualized in the interactive Tree Of Life V4 tool (<http://itol.embl.de>) [35],

**Table S1:** Percent of similarity between the sequences of each Colombian clinical isolate with the sequences deposited on the Genebank database, in the two genes evaluated (Cytb and HSP70)

| Genome ID | Cytb gene |            | HSP70 gene |            |
|-----------|-----------|------------|------------|------------|
|           | E value   | Per. Ident | E value    | Per. Ident |
| LpBON83   | 0         | 99.82%     | 2.00E-144  | 98.91%     |
| LpBON94   | 0         | 99.65%     | 3.00E-147  | 98.99%     |
| LpS7694   | 0         | 99.16%     | 7.00E-138  | 98.93%     |
| LpS7762   | 0         | 99.31%     | 7.00E-148  | 99.00%     |
| LpS7842   | 0         | 99.46%     | 2.00E-147  | 99.33%     |
| LpS8036   | 0         | 99.48%     | 3.00E-146  | 98.93%     |
| LpS8046   | 0         | 99.45%     | 5.00E-149  | 98.97%     |
| LpS8049   | 0         | 99.48%     | 1.00E-150  | 98.99%     |
| LpS8056   | 0         | 99.47%     | 2.00E-149  | 99.08%     |
| LpS8061   | 0         | 98.79%     | 6.00E-144  | 98.33%     |
| LpS8072   | 0         | 99.46%     | 3.00E-141  | 98.63%     |
| LpS8087   | 0         | 99.65%     | 5.00E-149  | 99.00%     |
| LpS8092   | 0         | 99.12%     | 1.00E-150  | 98.70%     |
| LpS8109   | 0         | 99.65%     | 3.00E-147  | 98.68%     |
| LpS8117   | 0         | 98.94%     | 1.00E-150  | 98.70%     |
| LpS8124   | 0         | 98.80%     | 4.00E-150  | 98.69%     |
| LpS8131   | 0         | 99.40%     | 7.00E-148  | 98.68%     |
| LpS8136   | 0         | 98.90%     | 3.00E-152  | 98.71%     |
| LpS8144   | 0         | 99.70%     | 9.00E-152  | 99.34%     |

**Table S2:** List of genes with copy number variations (z score cut off >2 and adjusted p-value) in all the genomes analyzed

| Gene id          | Chromosome   | Start   | End     | Gene annotation                   | LPP5C-1 | SRR10246848 | SRR10246849 | LpS8036 | LpS8046 | LpS8072 | LpS8092 | LpS8131 | LpBON83 | LpS7762 | LpS7842 | LpS8056 | LpS8061 | LpS8109 | LpBON94 | LpS7694 | LpS8049 | LpS8087 | LpS8117 | LpS8124 | LpS8136 | LpS8144 |
|------------------|--------------|---------|---------|-----------------------------------|---------|-------------|-------------|---------|---------|---------|---------|---------|---------|---------|---------|---------|---------|---------|---------|---------|---------|---------|---------|---------|---------|---------|
| LpanUA.04.0250   | LpanUA_04_V6 | 48630   | 50375   | hypothetical_protein_c            | 14.445  | 14.014      | 18.309      | 13.320  | 8.068   | 13.233  | 13.320  | 13.730  | 15.945  | 14.844  | 14.745  | 11.677  | 15.813  | 14.022  | 11.089  | 20.414  | 12.775  | 21.659  | 15.560  | 13.746  | 16.516  | 15.604  |
| LpanUA.05.0520   | LpanUA_05_V6 | 168946  | 170670  | ATPase_alpha_subunit              | 5.260   | 5.131       | 3.240       | 2.789   | 2.836   | 2.623   | 2.730   | 2.512   | 3.276   | 2.770   | 2.798   | 3.274   | 2.861   | 2.907   | 2.788   | 2.977   | 3.081   | 2.772   | 3.185   | 2.928   | 2.881   | 3.081   |
| LpanUA.08.0670   | LpanUA_08_V6 | 18271   | 18858   | amastin-like_protein              | 6.259   | 6.108       | 8.081       | 3.196   | 4.285   | 3.307   | 3.730   | 5.030   | 5.377   | 4.730   | 6.498   | 8.588   | 7.932   | 7.684   | 5.134   | 5.450   | 6.762   | 6.798   | 5.376   | 7.200   | 6.973   | 5.755   |
| LpanUA.08.0820   | LpanUA_08_V6 | 372337  | 373662  | cathepsin_L-like_protea           | 2.590   | 3.304       | 3.012       | 2.549   | 2.463   | 2.675   | 2.465   | 2.288   | 3.189   | 2.738   | 3.158   | 2.742   | 2.635   | 2.917   | 2.125   | 3.183   | 2.814   | 3.304   | 3.141   | 3.095   | 2.952   | 2.970   |
| LpanUA.08.0990   | LpanUA_08_V6 | 278276  | 278839  | amastin-like_protein              | 36.277  | 19.041      | 10.623      | 14.406  | 9.178   | 14.573  | 14.574  | 8.616   | 12.643  | 9.688   | 12.416  | 10.349  | 19.238  | 14.641  | 9.278   | 10.134  | 5.549   | 12.912  | 12.036  | 5.547   | 10.024  | 8.768   |
| LpanUA.08.1025   | LpanUA_08_V6 | 276815  | 277417  | tuzin-like_putative               | 15.818  | 17.214      | 10.910      | 7.863   | 5.423   | 8.892   | 8.278   | 5.386   | 6.553   | 4.990   | 6.360   | 5.773   | 12.108  | 8.766   | 4.997   | 5.635   | 3.023   | 6.978   | 7.778   | 3.206   | 6.315   | 5.212   |
| LpanUA.09.0180   | LpanUA_09_V6 | 63619   | 63993   | ATG8/AUT7/APG8/PAZ2               | 22.516  | 15.856      | 19.936      | 13.050  | 8.515   | 13.052  | 12.569  | 15.351  | 15.601  | 11.381  | 17.826  | 20.100  | 15.872  | 19.949  | 15.411  | 17.879  | 15.582  | 16.020  | 16.160  | 17.500  | 11.653  | 16.075  |
| LpanUA.09.1075   | LpanUA_09_V6 | 414178  | 414648  | term=tRNA-Arg 15.009 2:           | 14.768  | 25.210      | 15.116      | 12.799  | 9.834   | 12.962  | 13.215  | 12.122  | 20.996  | 15.981  | 17.322  | 19.958  | 19.820  | 17.512  | 20.076  | 18.450  | 21.876  | 18.798  | 22.376  | 20.574  | 19.656  | 17.815  |
| LpanUA.10.0510.N | LpanUA_10_V6 | 195968  | 197454  | metallo-peptidase_Clar            | 10.740  | 10.491      | 4.974       | 5.974   | 11.784  | 6.337   | 6.276   | 6.362   | 10.454  | 4.613   | 3.866   | 3.514   | 16.754  | 17.292  | 4.975   | 2.054   | 5.237   | 3.393   | 10.660  | 5.574   | 5.583   | 2.931   |
| LpanUA.10.0540.N | LpanUA_10_V6 | 214644  | 215936  | metallo-peptidase_Clar            | 8.087   | 7.895       | 6.387       | 2.732   | 2.018   | 2.806   | 2.634   | 2.182   | 5.475   | 4.602   | 6.761   | 5.597   | 5.500   | 4.008   | 5.361   | 6.553   | 2.856   | 4.378   | 5.540   | 3.159   | 6.589   | 2.853   |
| LpanUA.11.1170   | LpanUA_06_V6 | 509692  | 510681  | TATE_DNA_transposons              | 2.661   | 2.588       | 4.188       | 4.992   | 5.000   | 4.657   | 5.278   | 5.187   | 5.024   | 3.217   | 3.650   | 6.795   | 6.560   | 4.051   | 5.169   | 4.547   | 4.803   | 6.805   | 5.951   | 3.605   | 3.441   | 3.864   |
| LpanUA.13.0190   | LpanUA_13_V6 | 97490   | 98845   | alpha_tubulin                     | 18.706  | 14.059      | 23.395      | 30.357  | 35.144  | 29.560  | 16.383  | 12.052  | 20.195  | 25.349  | 34.128  | 24.149  | 17.352  | 25.710  | 35.171  | 31.109  | 12.620  | 26.153  | 14.946  | 13.300  | 26.622  | 28.498  |
| LpanUA.13.2690   | LpanUA_13_V6 | 66172   | 68502   | hypothetical_protein_c            | 2.506   | 4.728       | 4.606       | 3.915   | 4.784   | 3.566   | 3.441   | 3.514   | 4.643   | 4.065   | 4.590   | 4.183   | 4.330   | 3.530   | 4.667   | 3.912   | 5.362   | 4.873   | 4.246   | 4.437   | 3.554   |         |
| LpanUA.16.0605   | LpanUA_16_V6 | 214686  | 214940  | histone_H3-like_putativ           | 32.726  | 58.567      | 60.136      | 7.714   | 8.209   | 7.133   | 6.228   | 12.787  | 8.428   | 10.058  | 7.861   | 8.679   | 7.751   | 12.691  | 6.155   | 9.502   | 14.519  | 7.779   | 15.414  | 16.987  | 12.918  | 13.075  |
| LpanUA.16.1480   | LpanUA_16_V6 | 577144  | 578928  | paraflagellar_rod_protei          | 5.282   | 2.609       | 3.773       | 3.120   | 2.268   | 2.940   | 2.612   | 3.383   | 4.104   | 4.495   | 3.315   | 2.802   | 2.332   | 3.921   | 3.254   | 3.785   | 4.008   | 3.027   | 4.458   | 4.093   | 2.594   | 2.611   |
| LpanUA.17.0005   | LpanUA_17_V6 | 32      | 1132    | TATE_DNA_transposons              | 7.722   | 7.539       | 5.031       | 2.509   | 6.318   | 2.698   | 2.566   | 11.179  | 9.376   | 10.348  | 11.398  | 8.545   | 7.770   | 11.131  | 10.851  | 11.997  | 12.099  | 11.719  | 9.976   | 10.262  | 12.538  |         |
| LpanUA.17.0090   | LpanUA_17_V6 | 27886   | 29235   | elongation_factor_1- $\alpha$ lp1 | 31.278  | 30.579      | 29.864      | 23.388  | 18.256  | 23.428  | 23.940  | 21.959  | 26.318  | 25.245  | 27.388  | 22.120  | 23.843  | 26.982  | 21.611  | 22.210  | 20.596  | 22.082  | 26.298  | 19.718  | 22.517  | 20.984  |
| LpanUA.19.1055   | LpanUA_19_V6 | 410950  | 411507  | NI                                | 8.990   | 8.779       | 11.942      | 6.652   | 7.269   | 6.637   | 7.142   | 5.993   | 7.139   | 6.504   | 7.964   | 9.856   | 8.866   | 9.791   | 7.307   | 6.398   | 8.077   | 9.093   | 6.774   | 9.363   | 8.239   | 8.590   |
| LpanUA.19.1905   | LpanUA_19_V6 | 662940  | 663185  | hypothetical_protein_u            | 10.094  | 9.859       | 16.617      | 11.207  | 7.281   | 11.928  | 11.326  | 11.050  | 12.440  | 15.413  | 14.241  | 14.836  | 15.456  | 14.875  | 10.865  | 13.144  | 13.826  | 14.161  | 13.022  | 12.664  | 11.976  | 16.866  |
| LpanUA.20.0483.N | LpanUA_20_V6 | 255787  | 256326  | amastin                           | 11.812  | 11.540      | 11.426      | 3.388   | 3.317   | 2.780   | 2.483   | 4.180   | 3.401   | 2.982   | 2.322   | 3.229   | 3.415   | 3.593   | 2.842   | 3.058   | 3.588   | 3.666   | 4.891   | 4.715   | 4.627   | 4.614   |
| LpanUA.20.0484   | LpanUA_20_V6 | 256444  | 257028  | tuzin-like_putative               | 19.742  | 19.296      | 18.822      | 12.764  | 23.270  | 12.775  | 12.342  | 25.896  | 15.299  | 13.138  | 10.474  | 16.187  | 15.322  | 15.439  | 14.649  | 14.116  | 12.380  | 14.305  | 17.922  | 16.665  | 16.144  | 16.719  |
| LpanUA.20.0946   | LpanUA_20_V6 | 450882  | 452090  | tuzin-like_putative               | 3.302   | 3.095       | 3.313       | 2.383   | 2.463   | 2.323   | 2.553   | 2.431   | 2.427   | 2.121   | 2.589   | 2.471   | 2.508   | 2.776   | 2.566   | 2.672   | 2.602   | 2.603   | 3.058   | 2.779   | 2.632   | 2.879   |
| LpanUA.20.1045   | LpanUA_20_V6 | 511604  | 512074  | tuzin-like_putative               | 9.318   | 9.100       | 8.716       | 4.615   | 4.975   | 3.991   | 4.468   | 7.570   | 6.952   | 3.999   | 4.820   | 4.922   | 5.854   | 5.959   | 7.215   | 5.581   | 4.208   | 6.312   | 7.162   | 4.628   | 5.923   | 6.269   |
| LpanUA.20.1257.N | LpanUA_20_V6 | 817516  | 818409  | NI                                | 19.875  | 31.201      | 42.641      | 22.023  | 22.102  | 21.127  | 21.649  | 25.869  | 21.683  | 21.318  | 13.146  | 21.791  | 16.771  | 22.172  | 17.170  | 16.657  | 28.823  | 20.020  | 26.034  | 25.661  | 23.411  | 22.178  |
| LpanUA.20.1444   | LpanUA_20_V6 | 743109  | 743609  | ubiquitin-conjugating_e           | 8.019   | 7.829       | 8.097       | 7.001   | 6.394   | 6.989   | 7.112   | 9.159   | 9.891   | 8.266   | 8.055   | 8.043   | 8.779   | 9.467   | 9.500   | 11.880  | 8.957   | 10.217  | 10.138  | 8.631   | 9.563   | 10.513  |
| LpanUA.20.2375   | LpanUA_20_V6 | 1217866 | 1218792 | tuzin-like_protein                | 9.659   | 9.434       | 17.087      | 5.574   | 10.098  | 5.542   | 5.631   | 5.930   | 9.953   | 9.094   | 9.111   | 9.826   | 8.563   | 12.354  | 8.029   | 7.502   | 9.463   | 8.762   | 10.435  | 7.538   | 9.315   | 10.033  |
| LpanUA.20.2376   | LpanUA_20_V6 | 1219011 | 1219502 | tuzin-like_putative               | 8.040   | 7.849       | 15.990      | 2.523   | 6.444   | 2.545   | 2.188   | 2.324   | 6.053   | 6.870   | 6.692   | 7.018   | 6.192   | 9.367   | 4.129   | 4.468   | 7.336   | 4.422   | 7.006   | 5.632   | 5.807   | 6.537   |
| LpanUA.20.2870   | LpanUA_20_V6 | 1413507 | 1414118 | amastin-like_protein              | 12.623  | 12.332      | 5.844       | 5.457   | 6.381   | 5.412   | 5.373   | 5.135   | 7.089   | 6.949   | 9.658   | 5.576   | 6.395   | 6.156   | 6.730   | 7.356   | 8.688   | 9.347   | 7.444   | 7.655   | 6.520   | 11.780  |
| LpanUA.20.4300   | LpanUA_20_V6 | 1404887 | 1405465 | amastin-like_surface_pr           | 9.681   | 9.455       | 12.243      | 3.832   | 3.404   | 3.640   | 3.434   | 4.530   | 3.570   | 3.741   | 2.829   | 3.867   | 3.456   | 3.944   | 3.157   | 3.004   | 5.294   | 3.575   | 4.484   | 4.249   | 4.205   | 4.094   |
| LpanUA.21.0010   | LpanUA_21_V6 | 12      | 1718    | pyruvate_kinase                   | 2.506   | 2.437       | 2.927       | 3.112   | 2.614   | 3.295   | 3.328   | 3.580   | 2.518   | 2.314   | 2.532   | 2.741   | 3.586   | 2.267   | 2.956   | 2.807   | 3.497   | 3.962   | 2.771   | 2.133   | 2.298   | 3.255   |
| LpanUA.27.2810   | LpanUA_05_V6 | 476185  | 477094  | hypothetical_protein              | 4.509   | 4.396       | 8.543       | 6.836   | 3.495   | 5.920   | 6.155   | 6.849   | 6.407   | 9.663   | 7.422   | 9.248   | 9.844   | 8.289   | 6.525   | 6.499   | 8.717   | 7.055   | 7.193   | 7.330   | 5.306   | 9.589   |
| LpanUA.27.2840   | LpanUA_05_V6 | 473685  | 475874  | metallo-peptidase_Clar            | 4.741   | 4.623       | 8.944       | 8.546   | 5.746   | 8.191   | 7.874   | 8.879   | 6.771   | 9.518   | 8.235   | 9.077   | 11.183  | 9.147   | 7.114   | 7.487   | 8.280   | 7.400   | 6.930   | 7.591   | 6.253   | 10.025  |
| LpanUA.28.2110   | LpanUA_28_V6 | 748347  | 749402  | zinc_transporter_putati           | 5.967   | 5.822       | 7.061       | 2.754   | 5.477   | 2.866   | 2.869   | 4.230   | 5.706   | 4.262   | 4.848   | 4.548   | 4.120   | 4.702   | 4.348   | 4.937   | 4.693   | 4.467   | 6.021   | 4.732   | 4.744   | 3.285   |
| LpanUA.28.2990   | LpanUA_28_V6 | 1075126 | 1077090 | heat-shock_protein_hsp            | 6.110   | 5.962       | 4.948       | 4.591   | 7.160   | 4.478   | 4.302   | 4.643   | 5.915   | 3.542   | 4.047   | 5.613   | 3.781   | 6.276   | 4.283   | 5.512   | 5.080   | 4.799   | 6.658   | 5.560   | 5.443   | 4.767   |
| LpanUA.30.1520   | LpanUA_30_V6 | 469311  | 469769  | ama1_protein_putative             | 8.540   | 8.339       | 8.157       | 5.491   | 5.276   | 5.516   | 5.444   | 5.109   | 5.931   | 5.761   | 5.555   | 4.991   | 6.293   | 5.468   | 5.192   | 5.536   | 6.330   | 5.947   | 6.204   | 10.992  | 4.866   | 5.221   |
| LpanUA.32.3900   | LpanUA_32_V6 | 1418541 | 1419629 | 3-hydroxyisobutyryl-coe           | 5.282   | 2.327       | 3.014       | 3.364   | 3.254   | 3.295   | 3.023   | 2.996   | 4.879   | 3.263   | 5.474   | 4.284   | 2.587   | 4.115   | 2.763   | 3.557   | 4.458   | 4.195   | 5.038   | 5.978   | 5.211   | 5.088   |
| LpanUA.33.0340   | LpanUA_33_V6 | 128882  | 130996  | heat_shock_protein_83-            | 12.965  | 12.667      | 18.065      | 13.823  | 18.045  | 13.859  | 13.875  | 15.163  | 18.516  | 15.358  | 19.203  | 15.849  | 15.181  | 14.920  | 15.899  | 17.647  | 17.843  | 18.346  | 19.109  | 22.461  | 17.397  | 14.686  |
| LpanUA.33.0960   | LpanUA_33_V6 | 301688  | 303019  | beta-tubulin                      | 32.241  | 35.587      | 42.701      | 37.839  | 32.731  | 37.647  | 37.742  | 29.319  | 34.583  | 32.802  | 36.926  | 35.723  | 38.372  | 33.264  | 38.765  | 36.619  | 37.807  | 33.253  | 36.240  | 33.946  | 36.197  | 38.438  |
| LpanUA.33.1880   | LpanUA_33_V6 | 669291  | 670709  | peptidase_M20/M25/M4              | 10.704  | 13.476      | 4.330       | 26.803  | 20.606  | 25.942  | 25.883  | 28.293  | 8.110   | 12.018  | 11.701  | 12.731  | 15.288  | 15.536  | 18.000  | 12.811  | 8.537   | 10.691  | 8.041   | 12.461  | 11.861  | 10.707  |
| LpanUA.34.0060   | LpanUA_34_V6 | 2308    | 3582    | pyruvate_kinase                   | 13.902  | 13.583      | 5.693       | 6.639   | 5.163   | 7.236   | 7.078   | 5.571   | 4.240   | 4.275   | 3.935   | 4.818   | 4.618   | 5.622   | 4.636   | 3.532   | 4.558   | 4.845   | 4.174   | 3.739   | 4.691   | 4.587   |
| LpanUA.34.1800   | LpanUA_34_V6 | 688960  | 689877  | 60S_ribosomal_protein_            | 2.083   | 3.679       | 3.447       | 2.640   | 2.036   | 3.001   | 2.834   | 2.540   | 2.686   | 4.990   | 2.084   | 2.663   | 5.087   | 2.466   | 2.076   | 2.819   | 2.255   | 2.966   | 2.577   | 2       |         |         |

**Table S3:** Total number of homozygous and heterozygous SNPs found in the genomes analyzed.

| <b>Genome ID</b> | <b>Homo</b> | <b>Hetero</b> | <b>Total</b> |
|------------------|-------------|---------------|--------------|
| LPPSC-1          | 2.774       | 649           | 3.423        |
| SRR10246848      | 3.153       | 579           | 3.732        |
| SRR10246849      | 2.896       | 546           | 3.442        |
| LpS8036          | 2.271       | 1.419         | 3.690        |
| LpS8046          | 2.694       | 518           | 3.212        |
| LpS8072          | 2.289       | 1.408         | 3.697        |
| LpS8092          | 2.289       | 1.411         | 3.700        |
| LpS8131          | 2.761       | 416           | 3.177        |
| LpBON83          | 1.165       | 1.579         | 2.744        |
| LpS7762          | 1.508       | 489           | 1.997        |
| LpS7842          | 1138        | 1471          | 2.609        |
| LpS8056          | 1.355       | 1.022         | 2.377        |
| LpS8061          | 2.456       | 558           | 3.014        |
| LpS8109          | 1.344       | 1.550         | 2.894        |
| LpBON94          | 1.465       | 968           | 2.433        |
| LpS7694          | 1.634       | 527           | 2.161        |
| LpS8049          | 1.214       | 656           | 1.870        |
| LpS8087          | 1110        | 1558          | 2.668        |
| LpS8117          | 1139        | 1594          | 2.733        |
| LpS8124          | 1.260       | 571           | 1.831        |
| LpS8136          | 1.335       | 693           | 2.028        |
| LpS8144          | 521         | 1421          | 1.942        |

**Table S4:** SNPs shared among the three clades identified.

a: SNP position on the gene

b: Change of nucleotide respect to reference (Ref/Alt)

| Gene id        | a      | b   | Funtional Impact | Gene Annotation                            |
|----------------|--------|-----|------------------|--------------------------------------------|
| LpanUA.01.0080 | 16203  | T/C | MODERATE         | carboxylase,putative                       |
| LpanUA.02.0120 | 25230  | G/A | MODERATE         | exportinT tRNAexportin -likeprotein        |
| LpanUA.02.0160 | 96145  | C/T | MODERATE         | phosphoglycanbeta1,3galactosyltransferase  |
| LpanUA.02.0550 | 246457 | G/C | MODERATE         | RetrotransposableelementSLACS              |
| LpanUA.02.0550 | 247375 | A/G | MODERATE         | RetrotransposableelementSLACS              |
| LpanUA.04.0060 | 10361  | A/G | MODERATE         | pteridinetransporter truncated ,putative   |
| LpanUA.04.0170 | 44238  | A/G | MODERATE         | exosomecomplexexonucleaseRRP40,putative    |
| LpanUA.04.0810 | 300310 | T/C | MODERATE         | serinepeptidase,ClanS-,familyS54,putative  |
| LpanUA.05.0540 | 176493 | T/C | MODERATE         | kinetoplast-associatedprotein-likeprotein  |
| LpanUA.06.0080 | 38590  | T/C | MODERATE         | ABCtransporter,putative                    |
| LpanUA.06.0080 | 38591  | A/G | MODERATE         | ABCtransporter,putative                    |
| LpanUA.06.0760 | 307077 | A/T | MODERATE         | RNA-bindingprotein-likeprotein             |
| LpanUA.07.1250 | 563972 | C/T | HIGH             | phosphoglycanbeta1,3galactosyltransferase1 |
| LpanUA.07.1250 | 564585 | A/G | MODERATE         | phosphoglycanbeta1,3galactosyltransferase1 |
| LpanUA.07.1250 | 564677 | A/G | MODERATE         | phosphoglycanbeta1,3galactosyltransferase1 |
| LpanUA.08.0637 | 232774 | C/T | MODERATE         | amastin-likeprotein                        |
| LpanUA.08.0637 | 233016 | A/C | MODERATE         | amastin-likeprotein                        |
| LpanUA.08.1025 | 276898 | G/A | HIGH             | tuzin-like,putative                        |
| LpanUA.10.1525 | 292330 | G/A | MODERATE         | metallo-peptidase,ClanMA M ,FamilyM8       |
| LpanUA.10.1525 | 292348 | A/G | MODERATE         | metallo-peptidase,ClanMA M ,FamilyM8       |
| LpanUA.10.1525 | 292350 | A/T | MODERATE         | metallo-peptidase,ClanMA M ,FamilyM8       |
| LpanUA.10.1525 | 292380 | C/T | MODERATE         | metallo-peptidase,ClanMA M ,FamilyM8       |

|                |        |     |          |                                                         |
|----------------|--------|-----|----------|---------------------------------------------------------|
| LpanUA.10.1525 | 292393 | T/C | MODERATE | metallo-peptidase,ClanMA M ,FamilyM8                    |
| LpanUA.09.0004 | 418    | A/T | MODERATE | HypotheticalTATEDNATransposon fragment                  |
| LpanUA.09.0004 | 447    | T/C | MODERATE | HypotheticalTATEDNATransposon fragment                  |
| LpanUA.09.0180 | 63974  | G/C | MODERATE | ATG8/AUT7/APG8/PAZ2,putative                            |
| LpanUA.09.0180 | 63988  | G/A | MODERATE | ATG8/AUT7/APG8/PAZ2,putative                            |
| LpanUA.09.0880 | 323392 | A/C | MODERATE | kinetoplast-associatedprotein-likeprotein               |
| LpanUA.09.1400 | 530588 | T/C | MODERATE | histoneH2B                                              |
| LpanUA.09.1400 | 530630 | T/C | MODERATE | histoneH2B                                              |
| LpanUA.10.0370 | 138177 | C/G | MODERATE | folate/biopterintransporter,putative                    |
| LpanUA.10.0370 | 138646 | C/T | MODERATE | folate/biopterintransporter,putative                    |
| LpanUA.10.0470 | 191189 | A/G | MODERATE | metallo-peptidase,ClanMA M ,FamilyM8                    |
| LpanUA.10.0520 | 199389 | C/G | MODERATE | metallo-peptidase,ClanMA M ,FamilyM8                    |
| LpanUA.10.1305 | 488351 | T/C | MODERATE | Putativeflagellarprotofilamentribbonprotein-likeprotein |
| LpanUA.11.0950 | 496915 | C/G | MODERATE | CyclinA/CDK2-associatedprotein                          |
| LpanUA.11.0960 | 502662 | C/T | MODERATE | ABCtransporter,putative                                 |
| LpanUA.11.0960 | 502834 | T/C | MODERATE | ABCtransporter,putative                                 |
| LpanUA.11.0960 | 505710 | T/C | MODERATE | ABCtransporter,putative                                 |
| LpanUA.11.0960 | 506019 | A/G | MODERATE | ABCtransporter,putative                                 |
| LpanUA.11.1020 | 538521 | G/A | MODERATE | ABCtransporter,putative                                 |
| LpanUA.13.0120 | 43785  | C/G | MODERATE | MCAK-likekinesin,putative                               |
| LpanUA.13.1380 | 529802 | C/T | MODERATE | phospholipid-transportingATPase1-likeprotein            |
| LpanUA.13.1380 | 531168 | T/C | MODERATE | phospholipid-transportingATPase1-likeprotein            |
| LpanUA.13.1380 | 531258 | G/T | MODERATE | phospholipid-transportingATPase1-likeprotein            |
| LpanUA.14.1150 | 524829 | T/C | MODERATE | tubfamilyprotein-likeprotein                            |
| LpanUA.15.0005 | 1477   | A/G | MODERATE | phosphoglycanbeta1,3galactosyltransferase1              |
| LpanUA.15.0005 | 1830   | A/G | MODERATE | phosphoglycanbeta1,3galactosyltransferase1              |
| LpanUA.15.0005 | 2244   | C/T | MODERATE | phosphoglycanbeta1,3galactosyltransferase1              |
| LpanUA.15.0005 | 2524   | T/C | MODERATE | phosphoglycanbeta1,3galactosyltransferase1              |
| LpanUA.15.0005 | 2599   | C/T | MODERATE | phosphoglycanbeta1,3galactosyltransferase1              |
| LpanUA.15.0005 | 2640   | A/G | HIGH     | phosphoglycanbeta1,3galactosyltransferase1              |
| LpanUA.16.0500 | 162107 | T/C | MODERATE | fucosekinase,putative                                   |
| LpanUA.16.0500 | 162830 | A/G | MODERATE | fucosekinase,putative                                   |
| LpanUA.16.1600 | 632130 | A/G | MODERATE | DNApolymeraselalphacatalyticsubunit,putative            |

|                |         |     |          |                                              |
|----------------|---------|-----|----------|----------------------------------------------|
| LpanUA.17.0100 | 42474   | C/T | MODERATE | receptor-typeadenylatecyclase,putative       |
| LpanUA.17.0100 | 42566   | A/G | MODERATE | receptor-typeadenylatecyclase,putative       |
| LpanUA.17.0100 | 42626   | T/C | MODERATE | receptor-typeadenylatecyclase,putative       |
| LpanUA.17.0100 | 42659   | T/C | MODERATE | receptor-typeadenylatecyclase,putative       |
| LpanUA.17.0100 | 42686   | G/A | MODERATE | receptor-typeadenylatecyclase,putative       |
| LpanUA.17.0100 | 43863   | A/G | MODERATE | receptor-typeadenylatecyclase,putative       |
| LpanUA.17.0100 | 43887   | C/T | MODERATE | receptor-typeadenylatecyclase,putative       |
| LpanUA.17.0100 | 44629   | C/A | MODERATE | receptor-typeadenylatecyclase,putative       |
| LpanUA.18.1010 | 386778  | A/G | MODERATE | mannosyltransferase-II,putative              |
| LpanUA.19.1010 | 303832  | T/A | MODERATE | kinesin,putative                             |
| LpanUA.08.1050 | 408666  | G/T | MODERATE | amastin-likeprotein                          |
| LpanUA.08.1050 | 408767  | T/A | MODERATE | amastin-likeprotein                          |
| LpanUA.08.1050 | 408774  | A/G | MODERATE | amastin-likeprotein                          |
| LpanUA.19.1560 | 560130  | G/A | MODERATE | glyceroluptakeprotein,putative               |
| LpanUA.19.1740 | 611305  | C/T | MODERATE | proteinkinase,putative                       |
| LpanUA.20.0480 | 245154  | G/A | MODERATE | betagalactofuranosylglycosyletransferase     |
| LpanUA.20.0482 | 252171  | A/G | MODERATE | splicingfactorPTSR1interactingprotein        |
| LpanUA.20.0485 | 259990  | G/C | MODERATE | amastin                                      |
| LpanUA.20.0860 | 430357  | T/A | MODERATE | DNA-directedRNApolymerasesubunit,putative    |
| LpanUA.20.1045 | 511780  | T/A | MODERATE | tuzin-like,putative                          |
| LpanUA.20.1046 | 512740  | G/A | MODERATE | tuzin-likeprotein                            |
| LpanUA.20.1046 | 512823  | C/G | MODERATE | tuzin-likeprotein                            |
| LpanUA.20.1046 | 512830  | A/G | MODERATE | tuzin-likeprotein                            |
| LpanUA.20.1046 | 512851  | A/G | MODERATE | tuzin-likeprotein                            |
| LpanUA.20.1290 | 607199  | T/C | MODERATE | mitochondrialDNApolymeraseIproteinA,putative |
| LpanUA.20.1433 | 688751  | A/G | MODERATE | tyrosinephosphataseisoform                   |
| LpanUA.20.1444 | 743134  | A/G | MODERATE | ubiquitin-conjugatingenzyme,putative         |
| LpanUA.20.1444 | 743303  | G/A | MODERATE | ubiquitin-conjugatingenzyme,putative         |
| LpanUA.20.1256 | 809270  | C/G | MODERATE | amastin-likeprotein                          |
| LpanUA.20.2150 | 1134112 | T/C | MODERATE | adaptorcomplexsubunitmediumchain3,putative   |
| LpanUA.20.2370 | 1216110 | T/C | MODERATE | amastin-likesurfaceprotein,putative          |
| LpanUA.20.2370 | 1216121 | A/C | MODERATE | amastin-likesurfaceprotein,putative          |
| LpanUA.20.2375 | 1218521 | A/G | MODERATE | tuzin-likeprotein                            |



|                |         |     |          |                                             |
|----------------|---------|-----|----------|---------------------------------------------|
| LpanUA.20.2375 | 1218543 | T/A | MODERATE | tuzin-likeprotein                           |
| LpanUA.20.2376 | 1219299 | T/A | MODERATE | tuzin-like,putative                         |
| LpanUA.20.2376 | 1219306 | A/G | MODERATE | tuzin-like,putative                         |
| LpanUA.20.2376 | 1219428 | G/A | MODERATE | tuzin-like,putative                         |
| LpanUA.20.2376 | 1219434 | C/A | MODERATE | tuzin-like,putative                         |
| LpanUA.20.2376 | 1219451 | C/G | MODERATE | tuzin-like,putative                         |
| LpanUA.20.2376 | 1219452 | G/C | MODERATE | tuzin-like,putative                         |
| LpanUA.20.2376 | 1219498 | A/G | MODERATE | tuzin-like,putative                         |
| LpanUA.20.2800 | 1355587 | C/G | MODERATE | putativeaminophospholipidtranslocase        |
| LpanUA.20.0950 | 1397977 | G/A | MODERATE | amastin-likesurfaceprotein,putative         |
| LpanUA.20.4300 | 1405183 | G/C | MODERATE | amastin-likesurfaceprotein,putative         |
| LpanUA.20.3950 | 1767581 | T/C | MODERATE | 20sproteasomebeta7subunit, putative         |
| LpanUA.20.3950 | 1767781 | T/C | MODERATE | 20sproteasomebeta7subunit, putative         |
| LpanUA.21.0010 | 170     | C/T | MODERATE | pyruvatekinase                              |
| LpanUA.21.0010 | 1063    | A/C | MODERATE | pyruvatekinase                              |
| LpanUA.21.0010 | 1148    | A/G | MODERATE | pyruvatekinase                              |
| LpanUA.22.0090 | 31318   | A/G | MODERATE | mRNACapmethyltransferase-likeprotein        |
| LpanUA.22.0630 | 261647  | T/G | MODERATE | 5'a2rel-relatedprotein                      |
| LpanUA.22.1440 | 602724  | A/G | MODERATE | alanyl-tRNAsynthetase,putative              |
| LpanUA.23.0040 | 10655   | A/C | MODERATE | betapropellerprotein,putative               |
| LpanUA.23.0570 | 198564  | A/G | MODERATE | ribosomalRNAmethyltransferase-likeprotein   |
| LpanUA.23.1550 | 684034  | A/G | MODERATE | DHHCzincfingerdomain-likeprotein            |
| LpanUA.24.0270 | 69043   | T/C | MODERATE | proteinphosphotase,putative                 |
| LpanUA.24.1120 | 384705  | G/A | MODERATE | pre-mRNAsplicingfactor,putative             |
| LpanUA.24.1450 | 502554  | T/C | MODERATE | kinesin,putative                            |
| LpanUA.25.1710 | 809443  | C/T | MODERATE | succinyl-CoAsynthetasealphasubunit,putative |
| LpanUA.25.2020 | 886263  | C/T | MODERATE | metallo-peptidase,ClanMG,FamilyM24          |
| LpanUA.25.2020 | 886286  | C/T | MODERATE | metallo-peptidase,ClanMG,FamilyM24          |
| LpanUA.25.2020 | 886364  | G/A | MODERATE | metallo-peptidase,ClanMG,FamilyM24          |
| LpanUA.25.2020 | 886427  | G/A | MODERATE | metallo-peptidase,ClanMG,FamilyM24          |
| LpanUA.25.2020 | 886470  | C/A | MODERATE | metallo-peptidase,ClanMG,FamilyM24          |
| LpanUA.25.2020 | 886568  | G/T | MODERATE | metallo-peptidase,ClanMG,FamilyM24          |
| LpanUA.25.2020 | 886593  | T/C | MODERATE | metallo-peptidase,ClanMG,FamilyM24          |

|                |         |     |          |                                                                                      |
|----------------|---------|-----|----------|--------------------------------------------------------------------------------------|
| LpanUA.26.0810 | 227095  | A/G | MODERATE | glutathioneperoxidase-likeprotein,putative                                           |
| LpanUA.27.0310 | 72890   | G/A | MODERATE | methylmalonyl-coenzymeamutase,putative                                               |
| LpanUA.28.2000 | 714017  | A/G | MODERATE | DNArepairprotein-likeprotein                                                         |
| LpanUA.28.2160 | 771426  | A/G | MODERATE | elongationfactorG2-likeprotein                                                       |
| LpanUA.28.2620 | 957492  | G/A | MODERATE | 2-oxoglutaratedehydrogenase,E2component,dihydrolipoamidesuccinyltransferase,putative |
| LpanUA.28.2880 | 1047672 | A/G | MODERATE | proteinphosphatase4catalyticsubunit,putative                                         |
| LpanUA.29.0080 | 19196   | A/G | MODERATE | QA-SNAREproteinputative                                                              |
| LpanUA.29.0130 | 39634   | T/C | MODERATE | proteasomeregulatorynon-ATPasesubunit,putative                                       |
| LpanUA.29.0600 | 215973  | A/G | MODERATE | DNArepairhelicase,putative                                                           |
| LpanUA.29.0800 | 281347  | C/G | MODERATE | U-boxdomainprotein,putative                                                          |
| LpanUA.30.1410 | 424313  | A/C | MODERATE | vacuolarassemblyproteinvps41,putative                                                |
| LpanUA.30.1520 | 469483  | C/T | MODERATE | ama1 protein,putative                                                                |
| LpanUA.30.1520 | 469508  | G/T | MODERATE | ama1 protein,putative                                                                |
| LpanUA.30.1520 | 469576  | T/C | MODERATE | ama1 protein,putative                                                                |
| LpanUA.30.1520 | 469593  | A/T | MODERATE | ama1 protein,putative                                                                |
| LpanUA.30.1520 | 469604  | G/T | MODERATE | ama1 protein,putative                                                                |
| LpanUA.30.1520 | 469611  | G/A | MODERATE | ama1 protein,putative                                                                |
| LpanUA.30.1940 | 672132  | A/G | MODERATE | cyclosoresubunit-likeprotein                                                         |
| LpanUA.31.0300 | 46190   | C/T | MODERATE | nucleolarprotein,putative                                                            |
| LpanUA.31.0400 | 73423   | A/G | MODERATE | mitoticcentromere-associatedkinesin MCAK ,putative                                   |
| LpanUA.31.0590 | 129484  | C/A | MODERATE | cysteinepeptidase,ClanCA, familyC2,putative                                          |
| LpanUA.31.0590 | 131257  | A/C | MODERATE | cysteinepeptidase,ClanCA, familyC2,putative                                          |
| LpanUA.31.0760 | 195744  | T/C | MODERATE | C-5steroldesaturase,putative                                                         |
| LpanUA.31.1110 | 312402  | A/G | MODERATE | sodiumstibogluconateresistanceprotein,putative                                       |
| LpanUA.31.1110 | 312435  | G/A | MODERATE | sodiumstibogluconateresistanceprotein,putative                                       |
| LpanUA.31.1650 | 583679  | C/T | MODERATE | pentamidineresistanceprotein1                                                        |
| LpanUA.31.2020 | 758236  | T/C | MODERATE | aminoacidpermease                                                                    |
| LpanUA.31.2020 | 758260  | A/C | MODERATE | aminoacidpermease                                                                    |
| LpanUA.31.2020 | 758311  | T/G | MODERATE | aminoacidpermease                                                                    |
| LpanUA.31.1990 | 767733  | C/T | MODERATE | aminoacidpermease                                                                    |
| LpanUA.31.2260 | 865974  | A/C | HIGH     | metallo-peptidase,ClanMA M ,FamilyM8                                                 |
| LpanUA.31.2260 | 865980  | T/C | MODERATE | metallo-peptidase,ClanMA M ,FamilyM8                                                 |

|                |         |     |          |                                                         |
|----------------|---------|-----|----------|---------------------------------------------------------|
| LpanUA.31.3490 | 1309283 | T/C | MODERATE | iron/zinc transporter protein-like protein              |
| LpanUA.31.3490 | 1309291 | A/G | MODERATE | iron/zinc transporter protein-like protein              |
| LpanUA.31.3490 | 1310023 | C/G | MODERATE | iron/zinc transporter protein-like protein              |
| LpanUA.32.0045 | 41      | T/A | MODERATE | hypothetical gamma-glutamyltransferase 1 hybrid protein |
| LpanUA.32.0045 | 68      | G/A | MODERATE | hypothetical gamma-glutamyltransferase 1 hybrid protein |
| LpanUA.32.1120 | 398367  | T/C | MODERATE | protein kinase, putative                                |
| LpanUA.33.0960 | 301760  | G/T | MODERATE | beta-tubulin                                            |
| LpanUA.33.0960 | 301784  | A/G | MODERATE | beta-tubulin                                            |
| LpanUA.33.0960 | 301785  | C/T | MODERATE | beta-tubulin                                            |
| LpanUA.33.0960 | 302143  | T/G | MODERATE | beta-tubulin                                            |
| LpanUA.33.0960 | 302150  | C/A | MODERATE | beta-tubulin                                            |
| LpanUA.33.0960 | 302182  | G/T | MODERATE | beta-tubulin                                            |
| LpanUA.33.0960 | 302546  | G/T | MODERATE | beta-tubulin                                            |
| LpanUA.33.1020 | 306874  | A/G | MODERATE | 2,4-dienoyl-coareductase fadh1, putative                |
| LpanUA.33.1190 | 366142  | T/C | MODERATE | protein, unknown function                               |
| LpanUA.33.1610 | 508635  | A/G | MODERATE | QA-SNARE protein putative                               |
| LpanUA.33.1730 | 604890  | T/A | MODERATE | lipase precursor-like protein                           |
| LpanUA.33.3520 | 1431137 | T/C | MODERATE | h1 histone-like protein                                 |
| LpanUA.34.0060 | 2379    | C/T | MODERATE | pyruvate kinase                                         |
| LpanUA.34.0060 | 2385    | C/T | MODERATE | pyruvate kinase                                         |
| LpanUA.34.0060 | 2475    | A/G | MODERATE | pyruvate kinase                                         |
| LpanUA.34.0060 | 2515    | T/G | MODERATE | pyruvate kinase                                         |
| LpanUA.34.0060 | 2549    | C/T | MODERATE | pyruvate kinase                                         |
| LpanUA.34.0060 | 2598    | A/G | MODERATE | pyruvate kinase                                         |
| LpanUA.34.0060 | 2618    | G/A | MODERATE | pyruvate kinase                                         |
| LpanUA.34.0060 | 3036    | C/A | HIGH     | pyruvate kinase                                         |
| LpanUA.34.0060 | 3047    | C/T | MODERATE | pyruvate kinase                                         |
| LpanUA.34.0060 | 3137    | T/C | MODERATE | pyruvate kinase                                         |
| LpanUA.34.1060 | 441433  | T/A | MODERATE | oligosaccharyltransferase-like protein                  |
| LpanUA.34.2270 | 873101  | A/G | MODERATE | protein kinase, putative                                |
| LpanUA.34.2300 | 886939  | C/G | MODERATE | metallo-peptidase, Clan MG, Family M24                  |
| LpanUA.34.2370 | 923424  | G/A | MODERATE | phosphoinositide-binding protein, putative              |
| LpanUA.34.2970 | 1164392 | C/T | MODERATE | ubiquitin-activating enzyme 1, putative                 |

|                |         |     |          |                                                              |
|----------------|---------|-----|----------|--------------------------------------------------------------|
| LpanUA.34.3010 | 1186737 | A/C | MODERATE | ATP-dependentRNAhelicase,putative                            |
| LpanUA.34.3010 | 1188500 | A/C | MODERATE | ATP-dependentRNAhelicase,putative                            |
| LpanUA.34.3401 | 1329367 | A/C | MODERATE | ABCtransporter,putative                                      |
| LpanUA.34.3403 | 1335645 | A/G | MODERATE | expression-siteassociated ESAG3 ,putative                    |
| LpanUA.34.3403 | 1335904 | A/G | MODERATE | expression-siteassociated ESAG3 ,putative                    |
| LpanUA.34.3403 | 1336123 | T/C | MODERATE | expression-siteassociated ESAG3 ,putative                    |
| LpanUA.34.3403 | 1336342 | G/C | MODERATE | expression-siteassociated ESAG3 ,putative                    |
| LpanUA.34.3403 | 1336726 | G/T | MODERATE | expression-siteassociated ESAG3 ,putative                    |
| LpanUA.34.3403 | 1336873 | T/C | MODERATE | expression-siteassociated ESAG3 ,putative                    |
| LpanUA.34.3403 | 1336885 | C/T | MODERATE | expression-siteassociated ESAG3 ,putative                    |
| LpanUA.34.3403 | 1336952 | T/G | MODERATE | expression-siteassociated ESAG3 ,putative                    |
| LpanUA.34.3403 | 1336953 | C/T | MODERATE | expression-siteassociated ESAG3 ,putative                    |
| LpanUA.34.3403 | 1337185 | C/T | MODERATE | expression-siteassociated ESAG3 ,putative                    |
| LpanUA.34.3403 | 1337205 | G/A | MODERATE | expression-siteassociated ESAG3 ,putative                    |
| LpanUA.34.3403 | 1337206 | A/G | MODERATE | expression-siteassociated ESAG3 ,putative                    |
| LpanUA.34.3403 | 1337241 | A/G | MODERATE | expression-siteassociated ESAG3 ,putative                    |
| LpanUA.34.3440 | 1354527 | G/T | MODERATE | structuralmaintenanceofchromosome SMC familyprotein,putative |
| LpanUA.34.4340 | 1656840 | T/C | MODERATE | DNApolymeraseepsiloncatalyticsubunit,putative                |
| LpanUA.34.5325 | 1960884 | G/C | MODERATE | cathepsin-likeprotein                                        |
| LpanUA.35.0100 | 13168   | A/G | MODERATE | L-ribulokinase,putative                                      |
| LpanUA.35.0100 | 14242   | C/T | MODERATE | L-ribulokinase,putative                                      |
| LpanUA.35.0650 | 157904  | G/A | MODERATE | ubiquitin-likeprotein,putative                               |
| LpanUA.35.1280 | 431997  | C/T | MODERATE | endonuclease/exonuclease/phosphatase,putative                |
| LpanUA.35.1330 | 446550  | C/T | MODERATE | GPI10                                                        |
| LpanUA.35.1330 | 446551  | T/C | MODERATE | GPI10                                                        |
| LpanUA.35.1330 | 446566  | T/C | MODERATE | GPI10                                                        |
| LpanUA.35.1330 | 446609  | C/G | MODERATE | GPI10                                                        |
| LpanUA.35.1330 | 447280  | C/T | MODERATE | GPI10                                                        |
| LpanUA.35.1330 | 447453  | C/T | MODERATE | GPI10                                                        |
| LpanUA.35.1330 | 447631  | T/C | MODERATE | GPI10                                                        |
| LpanUA.35.1330 | 447667  | C/T | MODERATE | GPI10                                                        |
| LpanUA.35.1330 | 447675  | G/A | MODERATE | GPI10                                                        |
| LpanUA.35.1330 | 447702  | T/C | MODERATE | GPI10                                                        |

|                |         |     |          |                                              |
|----------------|---------|-----|----------|----------------------------------------------|
| LpanUA.35.1330 | 447712  | T/C | MODERATE | GPI10                                        |
| LpanUA.35.3910 | 1375696 | G/A | MODERATE | calmodulin,putative                          |
| LpanUA.35.4500 | 1574404 | T/C | MODERATE | proteinkinase-likeprotein                    |
| LpanUA.35.4720 | 1684049 | T/C | MODERATE | aminoacidtransporter,putative                |
| LpanUA.35.5180 | 1852903 | T/C | MODERATE | translationinitiationfactor2subunit,putative |
| LpanUA.35.6310 | 2245263 | T/C | MODERATE | I6202.3-likeprotein                          |

---
